# Supplementary material for: Electric-Field Mapping of Optically Perturbed CdTe Radiation Detectors
Source: MDPI journal article supplement (doi:10.3390/s23104795), 2023-05-16
Supplement: s1 [file s1]

# SUPPLEMENTARY MATERIALS

## Electric Field Mapping of Optically Perturbed CdTe Radiation Detectors

Adriano Cola<sup>1\*</sup>, Lorenzo Dominici<sup>2</sup>, Antonio Valletta<sup>3</sup>

<sup>1</sup> Institute for Microelectronics and Microsystems, IMM-CNR, Via Monteroni, 73100, Lecce, Italy

<sup>2</sup> Institute of Nanotechnology, NANOTEC-CNR, Via Monteroni, 73100, Lecce, Italy

<sup>3</sup> Institute for Microelectronics and Microsystems, IMM-CNR, Via Del Fosso Del Cavaliere, 100, 00133, Rome, Italy

\* corresponding author: adriano.col@cnr.it

### 1. Simulated Electric Field maps/profiles at different instants

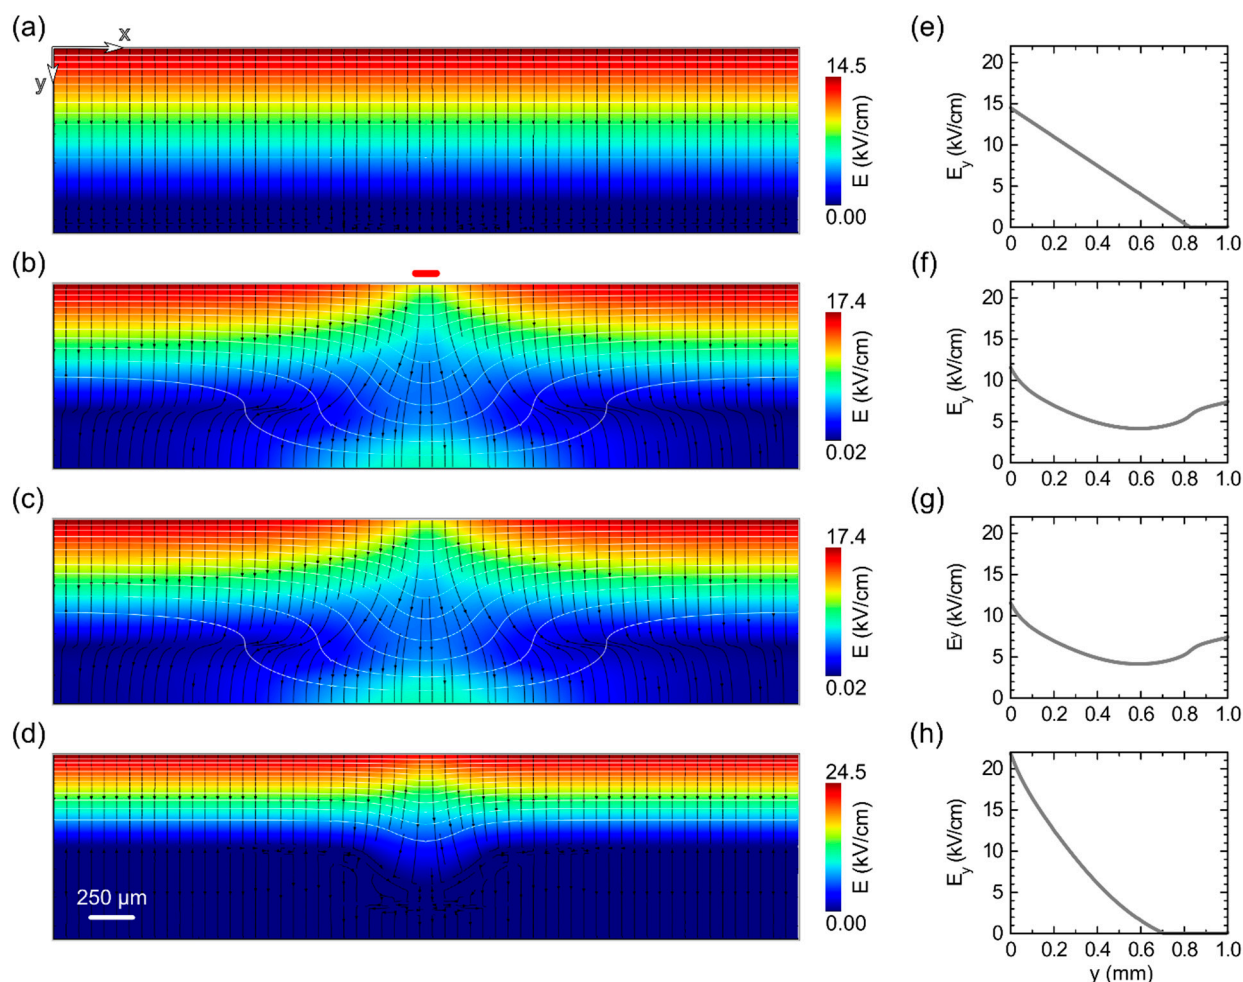

**Figure S1** Simulated Electric Field maps corresponding to the experimental ones in Fig.1: a) under dark, just before optical irradiation; b) under light, after 5 min of optical irradiation; c) under dark, 2 sec after the light switch-off; d) under dark 15min after the light switch-off. The corresponding profiles at  $x=0$  are also reported aside each map.

## 2. Simulated space charge profiles at different instants

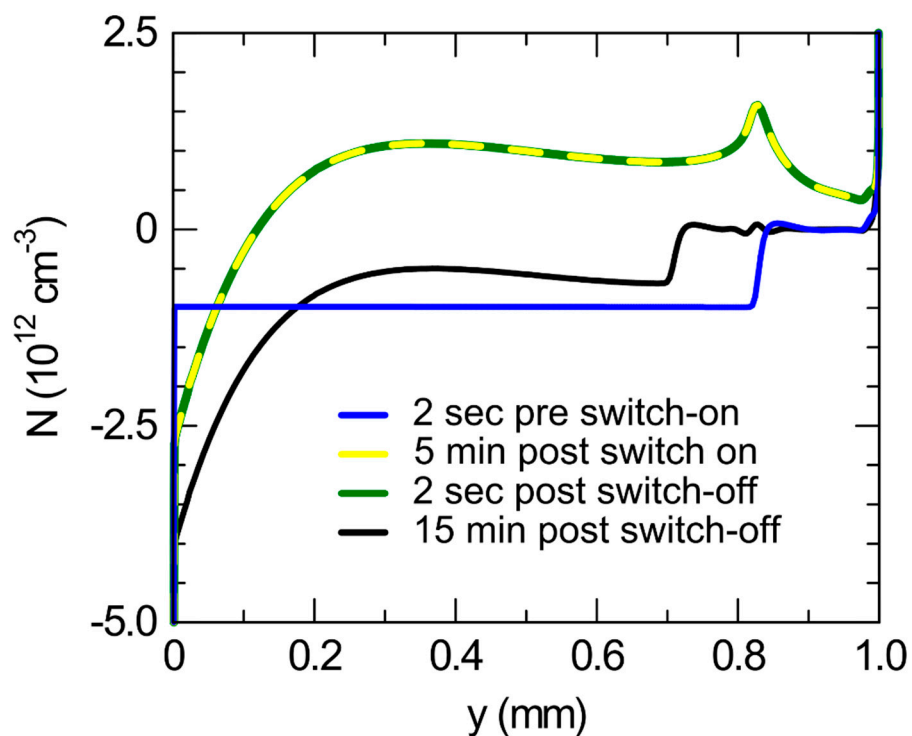

**Figure S2** Simulated space charge profiles at  $x=0$  (center of optical irradiation) at different instants: under dark just before light (black), under light, after 5 min of optical irradiation (green), under dark, 15 min after the light switch-off (blue). The peak of positive space charge under light corresponds to the maximum trapping occurring where the electric field becomes negligible near the cathode.

### 3. Simulation parameters

**Table S1.** Some relevant parameters of the simulations including those of the 2-level model.

|                                        |                                             |                                     |
|----------------------------------------|---------------------------------------------|-------------------------------------|
| <b>CdTe</b>                            |                                             |                                     |
| Shallow donor level<br>(fully ionized) | Concentration $N_d$                         | $2.8 \times 10^{13} \text{cm}^{-3}$ |
|                                        |                                             |                                     |
| Acceptor deep level                    | Energy $E_c - E_a$                          | 0.725eV                             |
|                                        | Concentration $N_a$                         | $5.8 \times 10^{13} \text{cm}^{-3}$ |
|                                        | Electr. capture cross section $\sigma_{ea}$ | $1 \times 10^{-18} \text{cm}^2$     |
|                                        | Hole capture cross section $\sigma_{ha}$    | $1.5 \times 10^{-19} \text{cm}^2$   |
| Electron mobility                      |                                             | $1000 \text{cm}^2/(\text{Vs})$      |
| Hole mobility                          |                                             | $80 \text{cm}^2/(\text{Vs})$        |
| Absorption coefficient                 |                                             | Ref. [30]                           |
| <b>In/CdTe/Pt Schottky diode</b>       |                                             |                                     |
| In/CdTe                                | electron barrier $\Phi_{In}$                | 0.5eV                               |
| Pt/CdTe                                | electron barrier $\Phi_{Pt}$                | 0.8eV                               |
| <b>Other parameters</b>                |                                             |                                     |
| Temperature                            |                                             | 40°C                                |
